# Supplementary material for: Hyaluronic acid mediated biomineralization of multifunctional ceria nanocomposites as ROS scavengers and tumor photodynamic therapy agents
Source: Royal Society of Chemistry journal article supplement (doi:10.1039/c8tb03374a), 2019-01-01
Supplement: c8tb03374a1.pdf [file c8tb03374a1.pdf]

## Supplementary information

### **Hyaluronic acid mediated biomineralization of multifunctional ceria nanocomposites as ROS scavengers and tumor photodynamic therapy agents**

Yiping Zeng <sup>a,1</sup>, Weinan Zeng <sup>a,b,1</sup>, Qing Zhou <sup>c</sup>, Xiaolin Jia <sup>a</sup>, Juan Li <sup>b</sup>, Zhangyou Yang <sup>d,\*</sup>, Yuhui Hao <sup>c,\*</sup>, Junli Liu <sup>a,\*</sup>

a Department of orthopedics, Chongqing general hospital, University of Chinese Academy of Sciences, Chongqing, 400014, China.

b Center for Joint Surgery, Southwest Hospital, Third Military Medical University (Army Medical University), Chongqing, 400038, China

c State Key Laboratory of Trauma Burns and Combined Injury, Institute of Combined Injury, College of Preventive Medicine, Third Military Medical University, No.30 Gaotanyan Street, Shapingba District, Chongqing, 400038, China

d Pharmaceutical Engineering Research Center, College of Pharmacy, Chongqing Medical University, Chongqing 400016, China; Chongqing

\* Address correspondence to oyzhangyou@126.com, yuhui\_hao@126.com,

lili198418@163.com

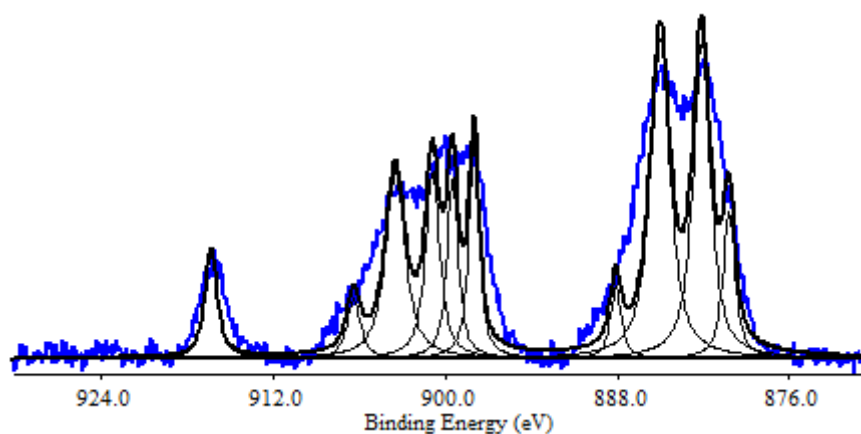

**Fig. S1.** The integrated XPS spectrum related to the valence state of cerium ions and corresponding binding energy peaks for  $\text{Ce}^{3+}$  (880.20, 885.00, 899.50 and 903.50 eV) and  $\text{Ce}^{4+}$  (882.10, 888.10, 898.00, 900.90, 906.40 and 916.35 eV).

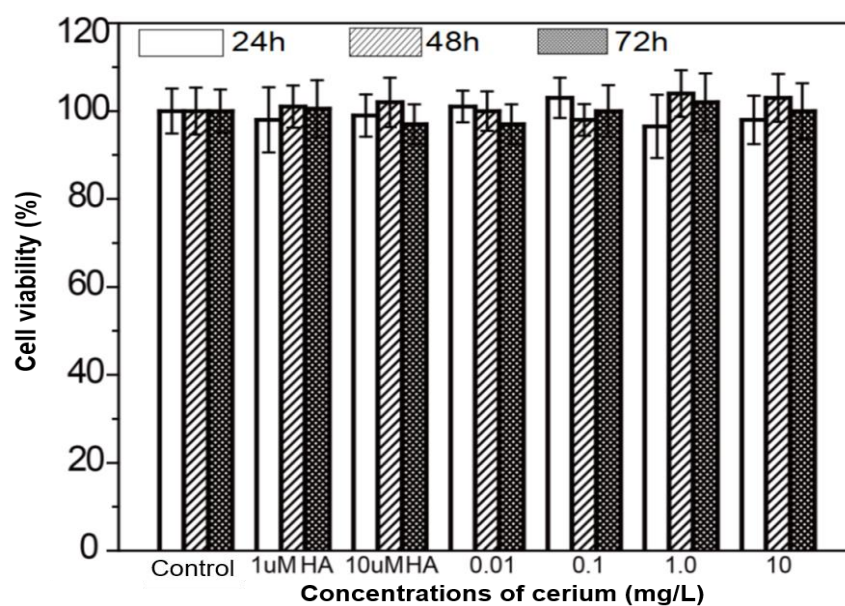

**Fig. S2.** Relative cell viability data obtained from the CCK-8 assay of L-02 Cell after treated with various concentrations of HA@CQDs for 24h, 48h and 72h.

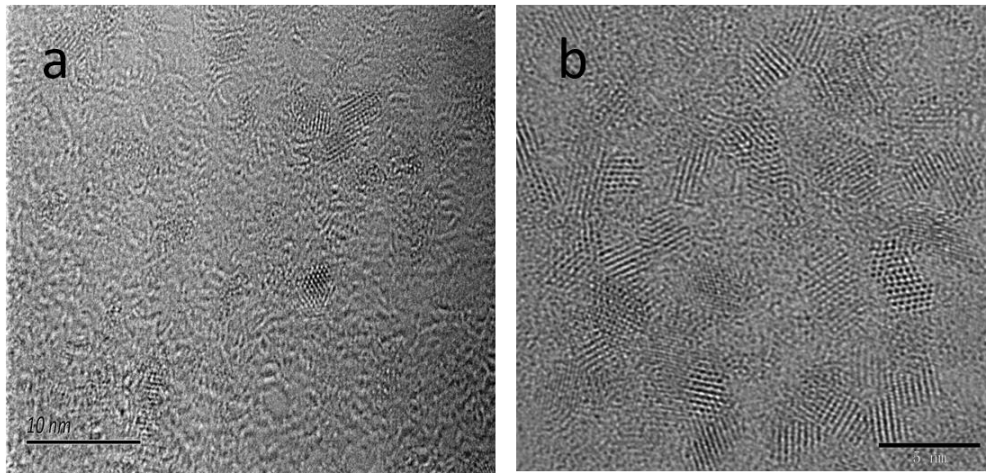

**Fig. S3.** The TEM spectrum of CNLs-Ce6 (a, scale bar 10nm) and HA@CQDs-Ce6 (b, scale bar 5nm)

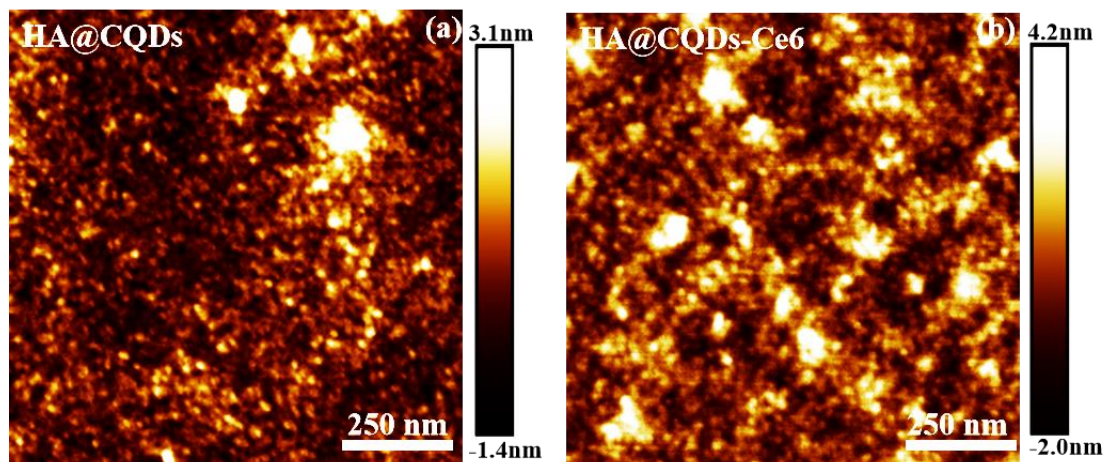

**Fig. S4.** The AFM spectrum of HA@CQDs (a) and HA@CQDs-Ce6 (b)

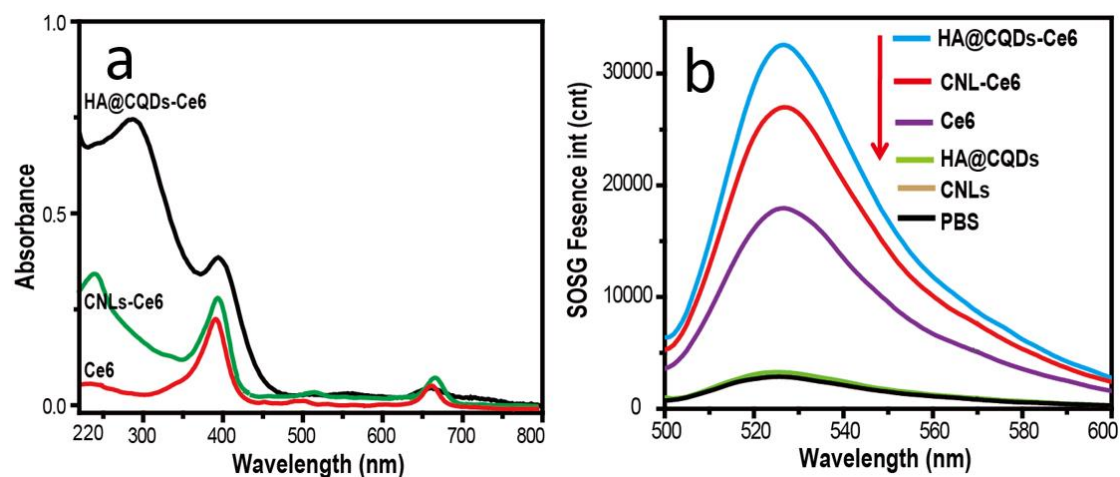

**Fig. S5.** (a) The UV/vis spectrum of Ce6, CNLs-Ce6, HA@CQDs-Ce6, (b) Singlet oxygen generation of HA@CQDs-Ce6, CNLs-Ce6, free Ce6, HA@CQDs, CNLs and PBS (1 mM) after irradiation with 660 nm laser (0.2 W/cm<sup>2</sup>) for 5min.

**Table s1** the ALT and AST value of the mice treatment with PBS and HA@CQDs

|         | ALT       | AST       |
|---------|-----------|-----------|
| PBS     | 32.4±15.7 | 40.9±15.3 |
| HA@CQDs | 42.9±22.5 | 63.9±16.7 |

**Table s2** the hematological markers value of the mice treatment with PBS and HA@CQDs

|         | WBC       | HGB      | RBC       | HCT       | MCV       | MCHC     | PLT     | PCT       |
|---------|-----------|----------|-----------|-----------|-----------|----------|---------|-----------|
| PBS     | 6.69±1.03 | 108±20.1 | 7.07±1.38 | 32.3±6.56 | 45.6±1.65 | 338±12.7 | 894±192 | 0.52±0.11 |
| HA@CQDs | 6.50±1.27 | 112±15.8 | 6.93±1.34 | 31.6±5.69 | 45.7±1.31 | 358±24.1 | 863±219 | 0.52±0.12 |

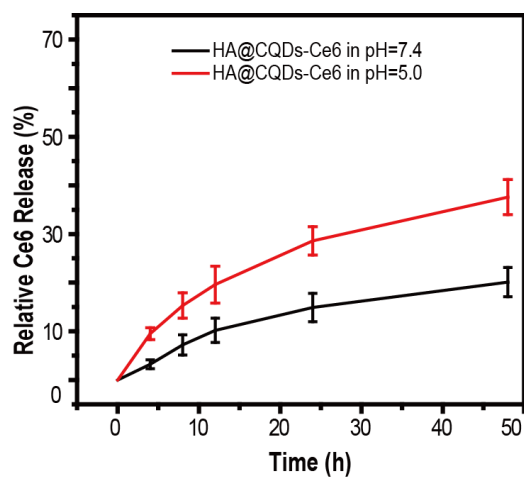

**Fig. S6.** Release of Ce6 from HA@CQDs-Ce6 in pH 7.4 and 5.0.

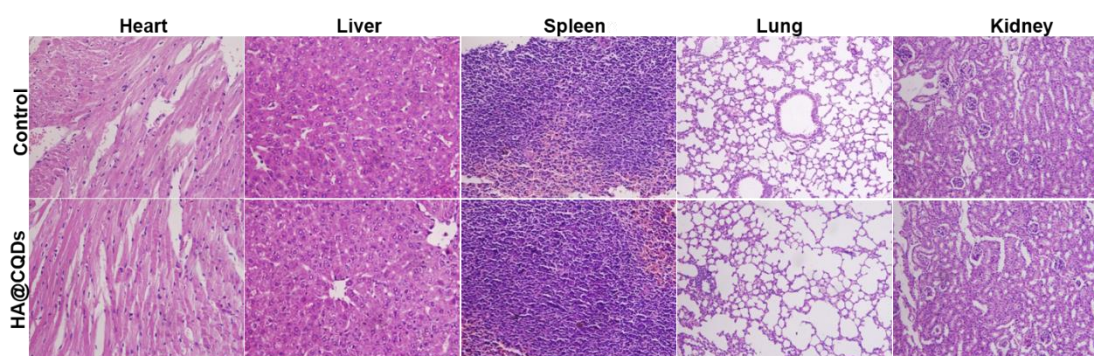

**Fig. S7.** H&E stained images of major organs collected from untreated mice and intravenously injected with HA@CQDs at day 2 post treatment.

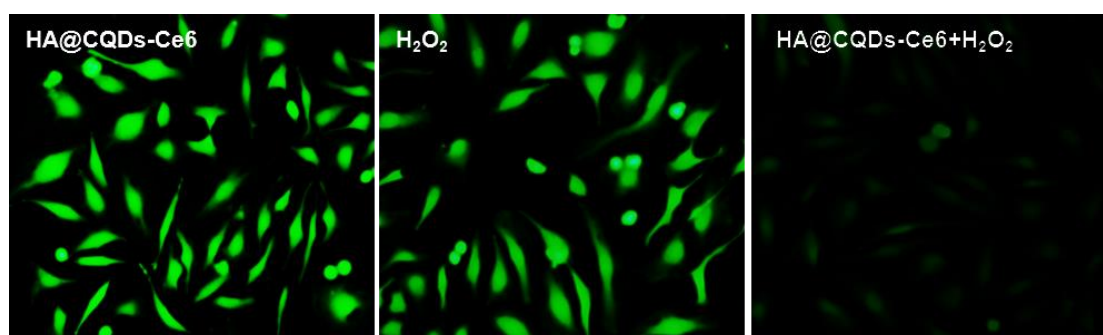

**Fig. S8.** the images of intracellular  $O_2$  generation after HeLa cells incubated with HA@CQDs-Ce6,  $H_2O_2$  and HA@CQDs-Ce6/ $H_2O_2$ .

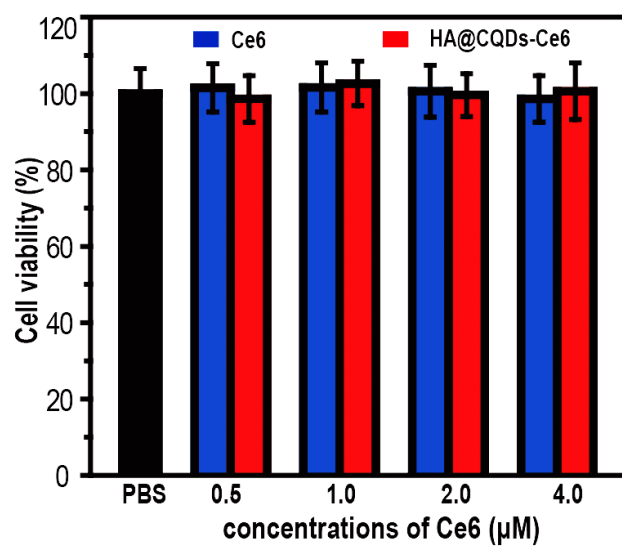

**Fig. S9.** Relative cell viability data obtained from the CCK-8 assay of HeLa cells after treated with various concentrations of Ce6, and HA@CQDs without light irradiation by 662 nm laser.
